# Supplementary figures and images for: Is there a link between very early changes of primary and secondary lymphoid organs in 18F-FDG-PET/MRI and treatment response to checkpoint inhibitor therapy?
Source: PubMed Central journal article supplement — J Immunother Cancer. 2020 Aug 4;8(2):e000656. doi: 10.1136/jitc-2020-000656 (PMC7406110; doi:10.1136/jitc-2020-000656), 2020-08-04

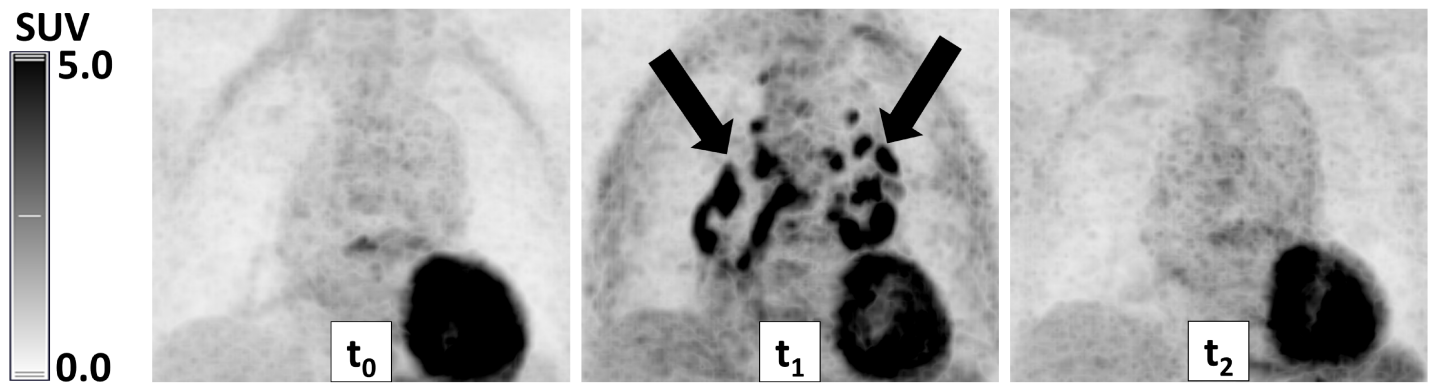

Supplement: jitc-2020-000656supp001.pdf [file jitc-2020-000656supp001.pdf]

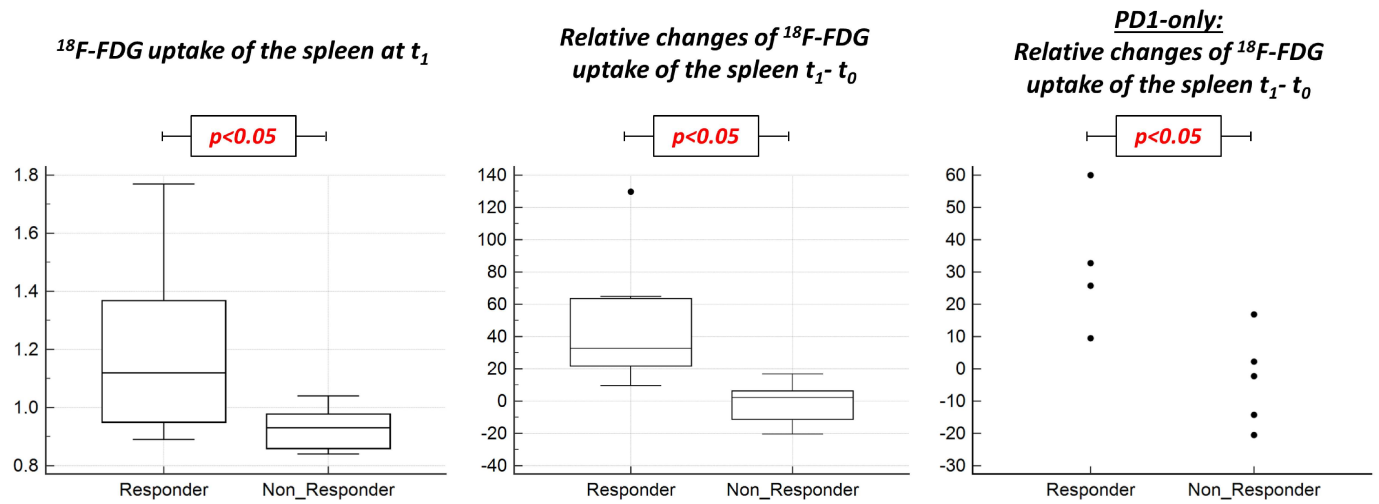

Supplement: jitc-2020-000656supp002.pdf [file jitc-2020-000656supp002.pdf]
